# Supplementary material for: Methodological artefacts in the XANES analysis of hexa-coordinated pentavalent arsenic
Source: Royal Society of Chemistry journal article supplement (doi:10.1039/c1ja10130g), 2011-01-01
Supplement: c1ja10130g.pdf [file c1ja10130g.pdf]

# Methodological artefacts in the XANES analysis of hexacoordinated pentavalent arsenic

Iris Koch,<sup>a</sup> Maeve Moriarty<sup>a</sup> Jie Sui<sup>a</sup> and Kenneth J. Reimer<sup>\*a</sup>

† Environmental Sciences Group, Royal Military College of Canada, Kingston, Ontario, K7K 7B4, Canada

The electronic supplementary information includes a description of the mass spectrometric experiment with the As(V)-glycerol compound, along with the results, and the XANES spectra obtained during the pH stability experiment of the As(V)-glycerol experiment.

## Mass Spectrometric Analysis

The As(V)-glycerol compound was dissolved in acetonitrile (12 mg in 2.4 mL to obtain ~5mg/mL) and directly infused to a Waters Micromass ZQ mass spectrometer, capable of electrospray (ESI) or atmospheric pressure chemical ionization (APCI). The compound was analyzed in ESI negative mode using the following parameters: capillary voltage 3.00 kV, cone voltage -55.56 V, extractor voltage -4.03 V, source temperature 100°C, desolvation temperature 200°C, desolvation flow rate 250 L/h, cone flow rate 66 L/h. A mass spectrum in ESI positive mode was also obtained with the following parameters: capillary voltage 3.00 kV, cone voltage 36.00 V, extractor voltage 3.00 V, source temperature 90°C, desolvation temperature 250°C, desolvation flow rate 250 L/h, cone flow rate 59 L/h.

Negative ions ( $[M]^-$ ) were observed in ESI negative mode (Figures S1a and S1b) that corresponded to the molecular mass of As(V)-glycerol (75 for As + 3 × 90.33 for glycerol - 1 =  $m/z$  345). Figure S2 shows the observed molecular ion  $[M]^-$  was in good agreement with the theoretical mass distribution generated by MassLynx software.

The results from positive ESI are shown in Figure S3, with peaks at  $m/z$  115.5,  $m/z$  207.5 and  $m/z$  279.6 corresponding to  $[\text{glycerol}+\text{Na}]^+$ ,  $[2\text{glycerol}+\text{Na}]^+$  and  $[3\text{glycerol}-3\text{HO}_2+\text{K}]^+$  respectively. In the spectrum, a series of unknown polymer pattern peaks with a repeat unit of 85 were also observed.

Also included are:

Figure S1

Figure S2

Figure S3

Figure S4

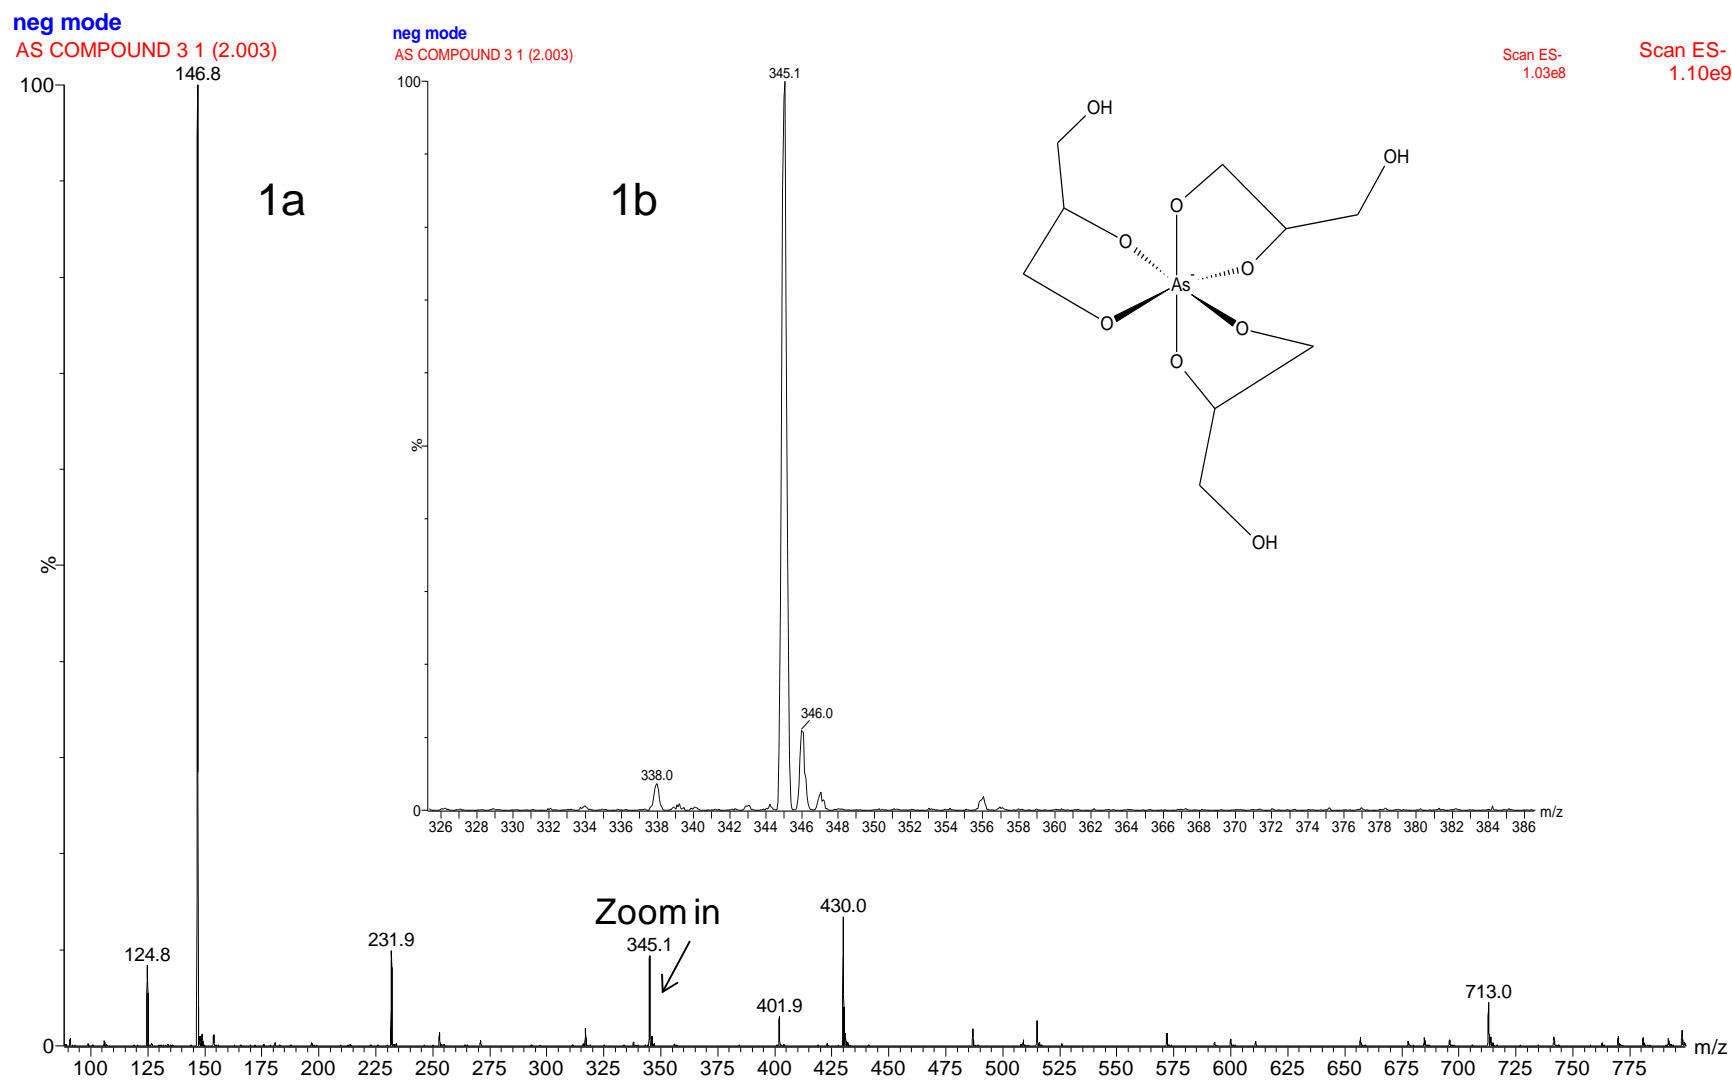

**Figure S1a and 1b (inset).** Negative ESI of As(V)-glycerol compound, with  $[M]^-$  peak at m/z 345.

neg mode

AS COMPOUND 3 (2.003) Cu (0.30); Is (1.00,1.00) C9H18AsO9

Scan ES-  
8.84e12

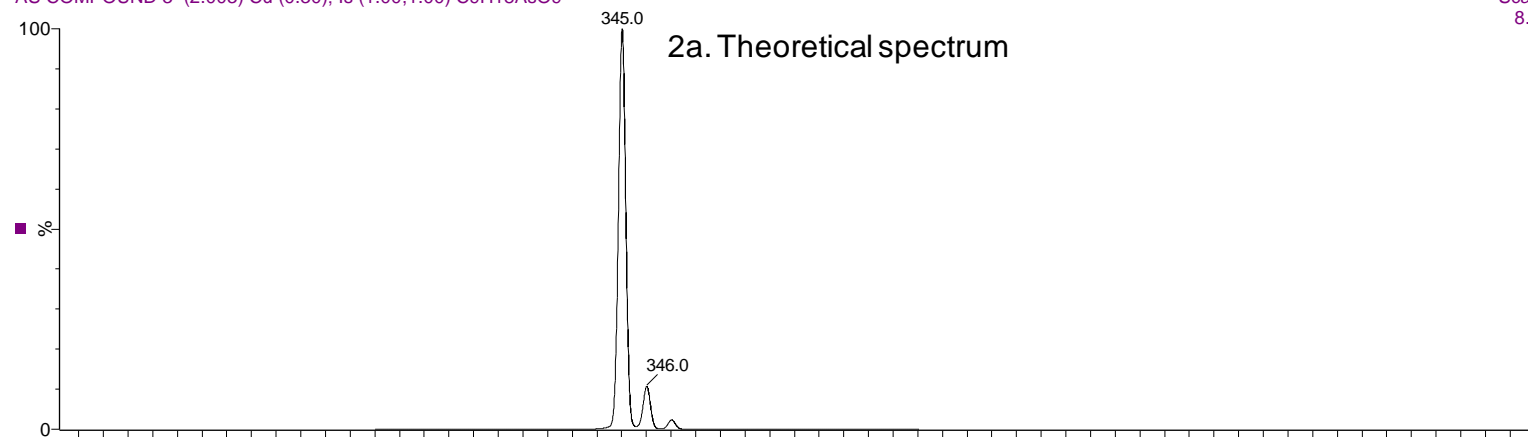

AS COMPOUND 3 1 (2.003)

Scan ES-  
1.03e8

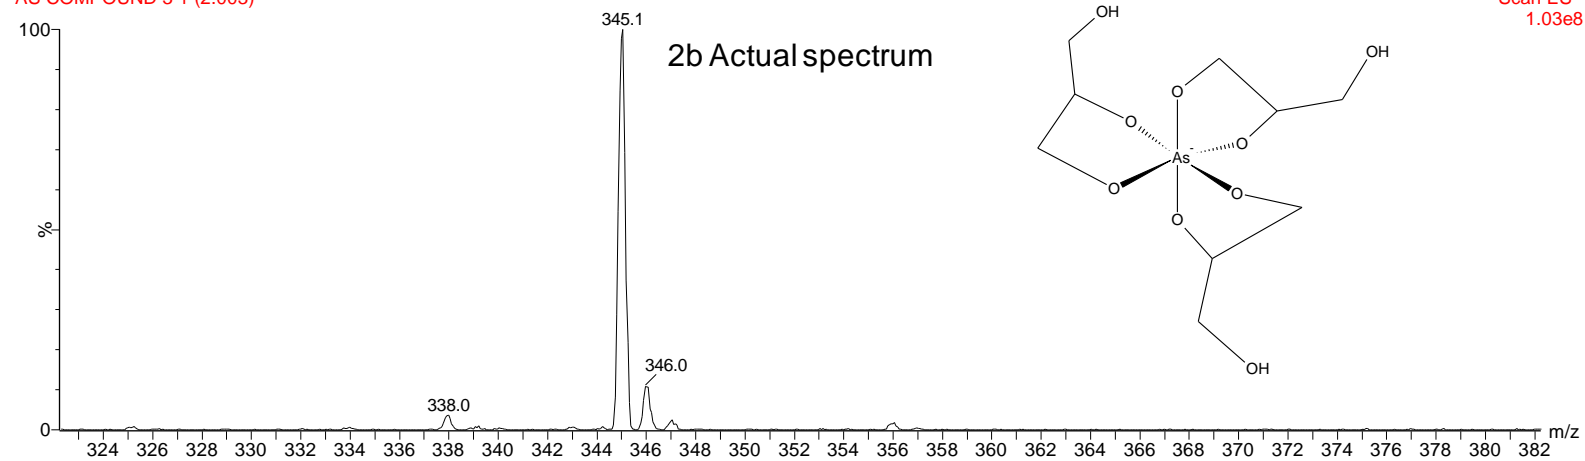

**Figure S2a and 2b.** Negative ESI mass spectrum of As(V) glycerol compound compared with theoretical ESI mass spectrum generated by MassLynx software.

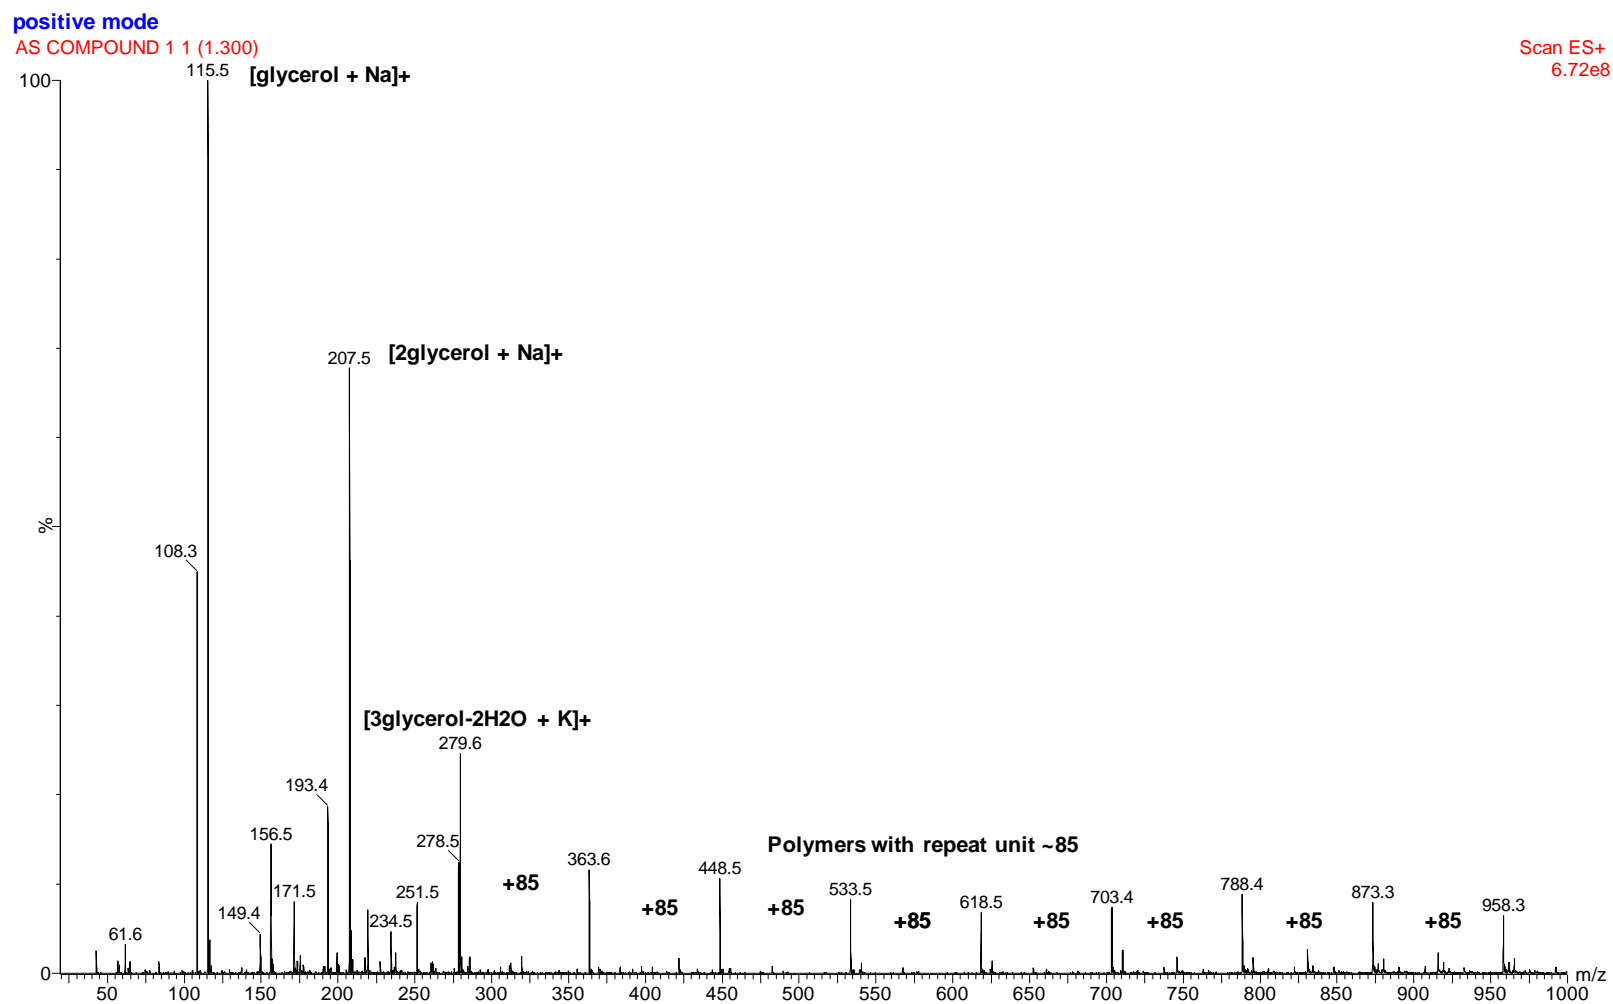

**Figure S3.** Positive ESI mass spectrum of As(V) glycerol compound.

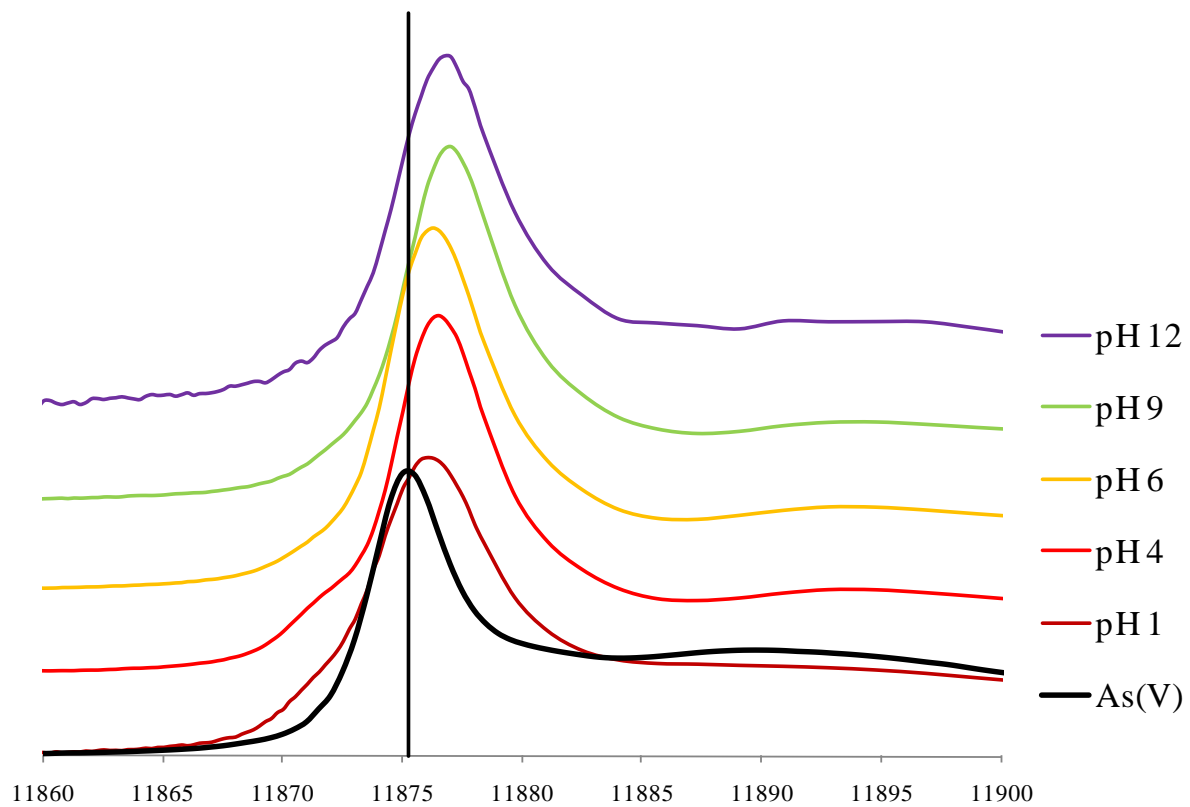

**Figure S4.** XANES spectra of As(V)-glycerol compound analyzed at different pHs.
